# Supplementary material for: c-CSN: Single-cell RNA Sequencing Data Analysis by Conditional Cell-specific Network
Source: PubMed Central journal article supplement — Genomics Proteomics Bioinformatics. 2021 Mar 5;19(2):319–29. doi: 10.1016/j.gpb.2020.05.005 (PMC8602759; doi:10.1016/j.gpb.2020.05.005), 2021-03-05

— 1 conditional gene    
 — 2 conditional genes    
 — 3 conditional genes  
— 4 conditional genes    
— 5 conditional genes

K-means

Hierarchical

K-means

Hierarchical

ARI

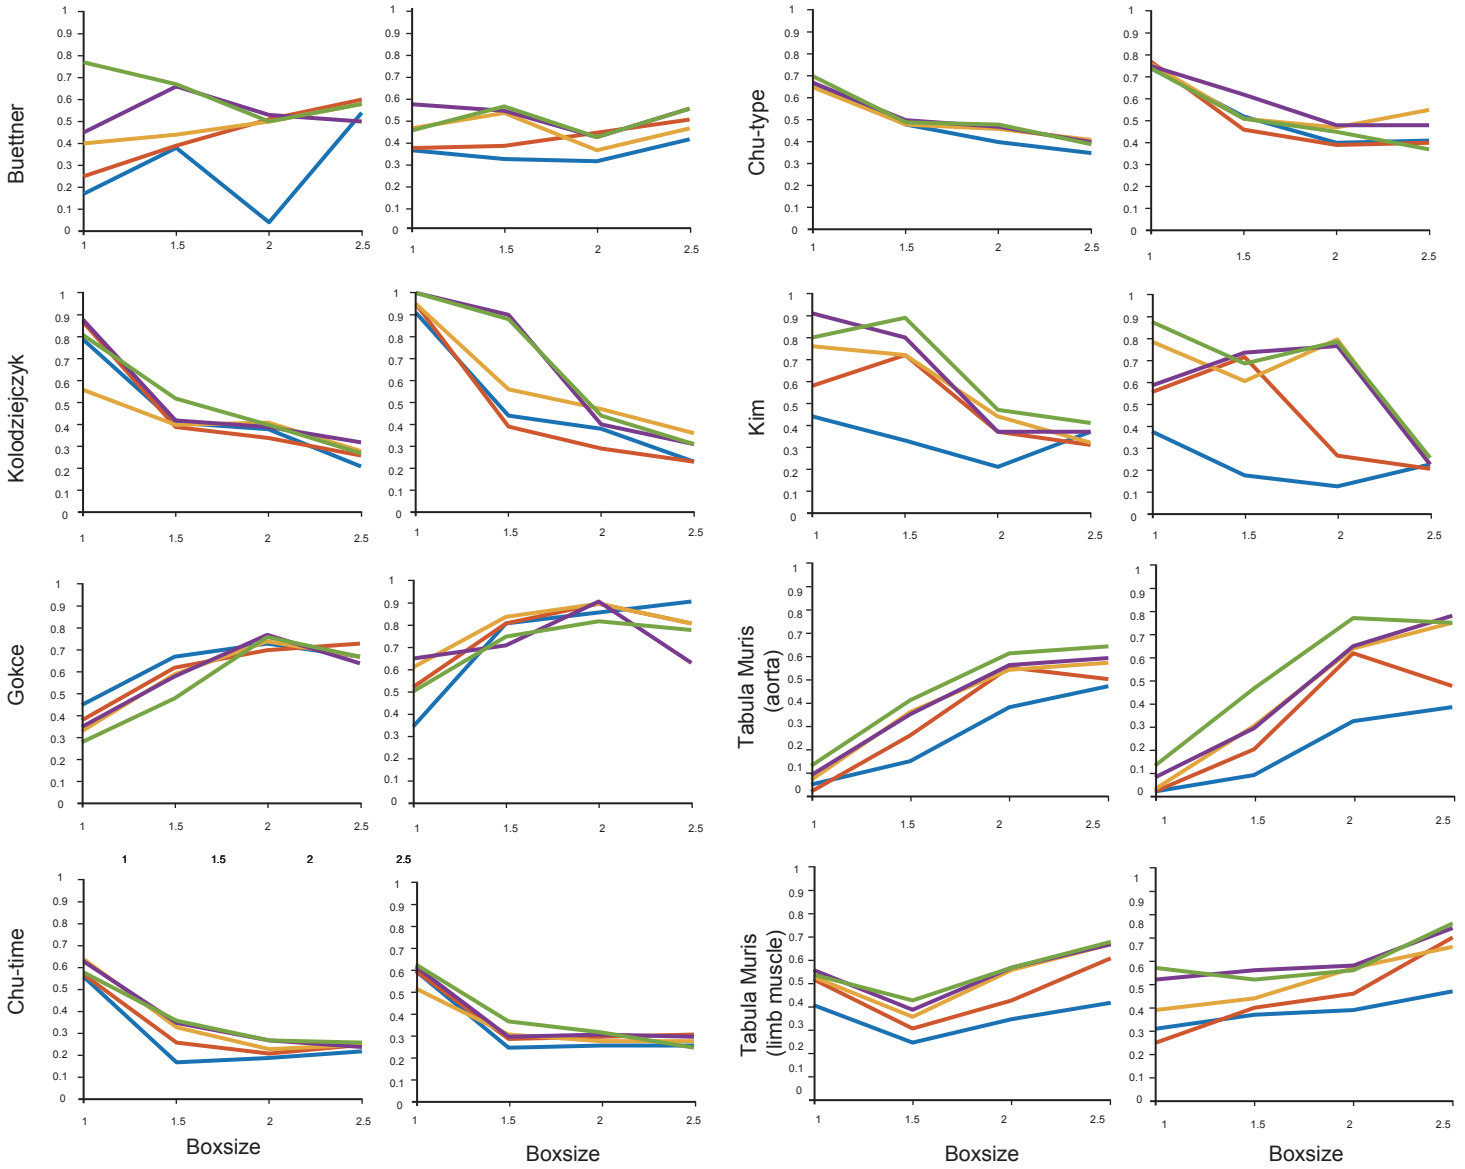

Supplement: mmc5.pdf [file mmc5.pdf]
