# Supplementary figures and images for: c-CSN: Single-cell RNA Sequencing Data Analysis by Conditional Cell-specific Network
Source: PubMed Central journal article supplement — Genomics Proteomics Bioinformatics. 2021 Mar 5;19(2):319–29. doi: 10.1016/j.gpb.2020.05.005 (PMC8602759; doi:10.1016/j.gpb.2020.05.005), 2021-03-05

A

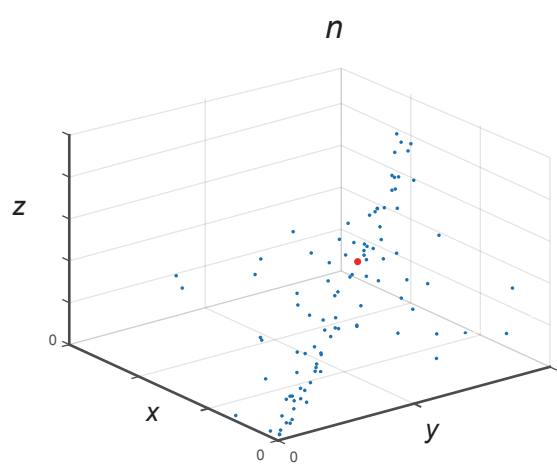

B

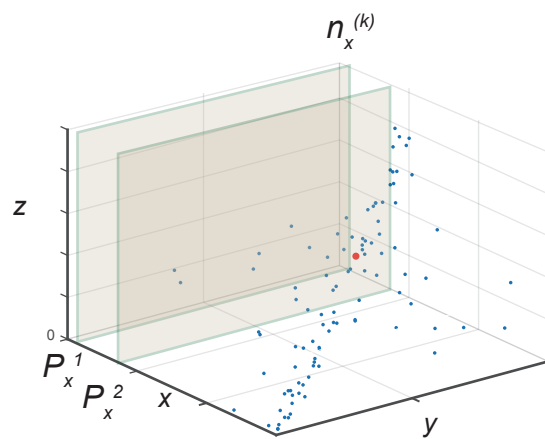

C

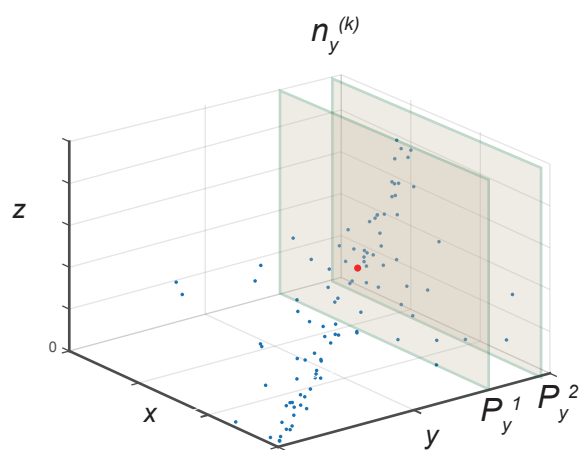

D

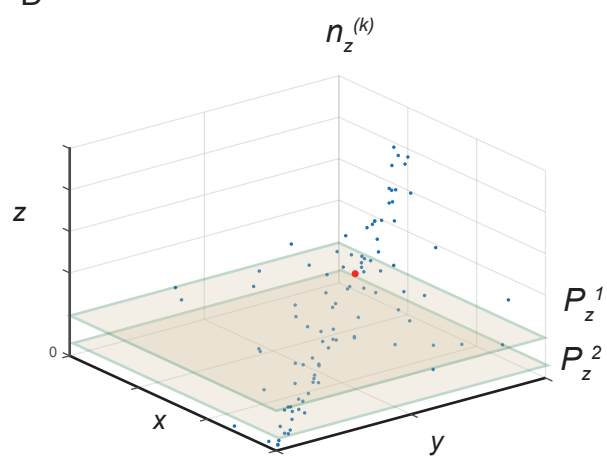

E

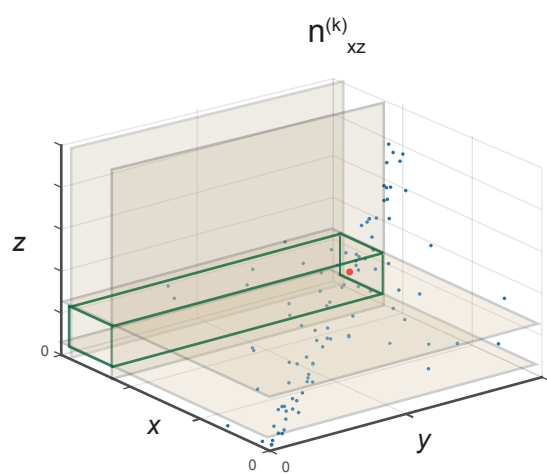

F

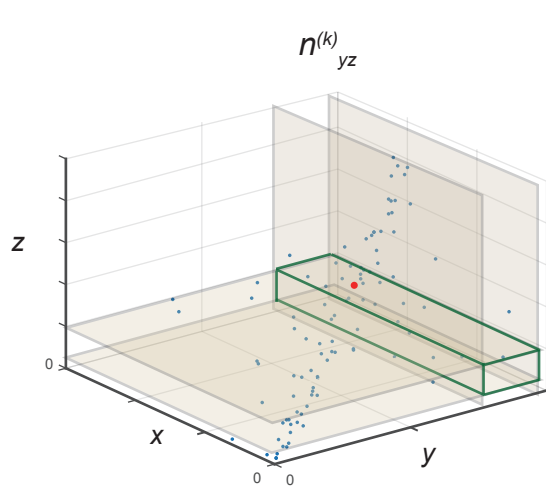

G

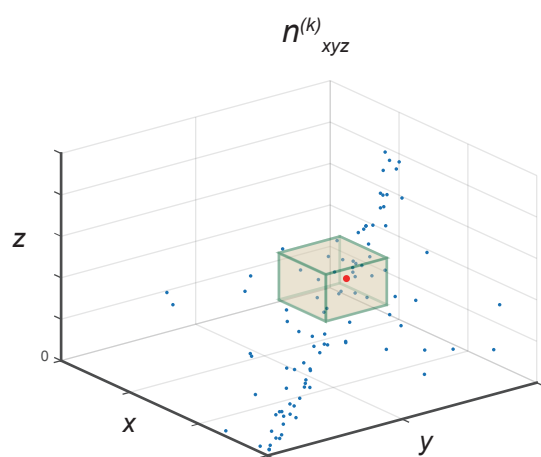

Supplement: mmc2.pdf [file mmc2.pdf]

A

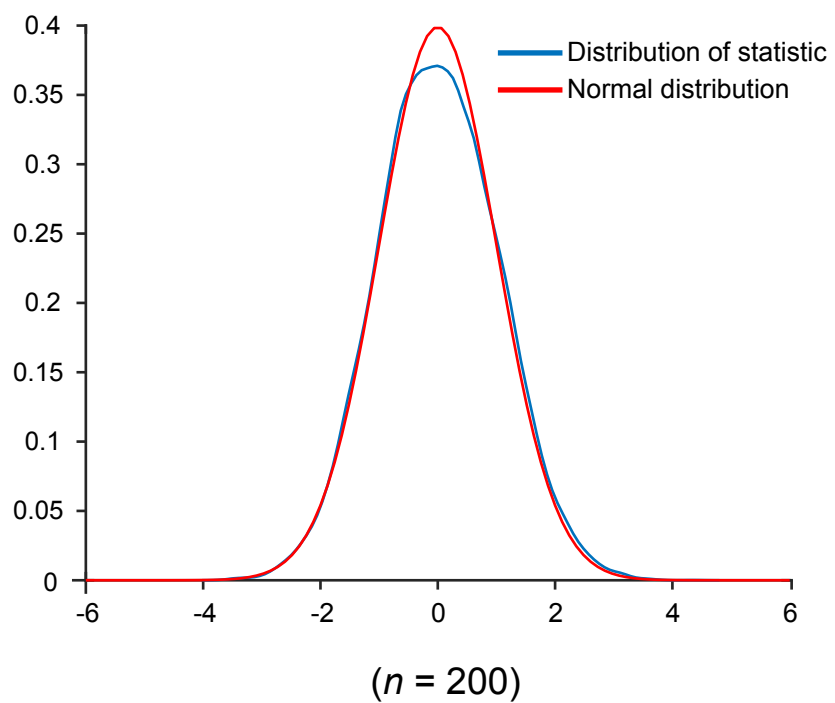

B

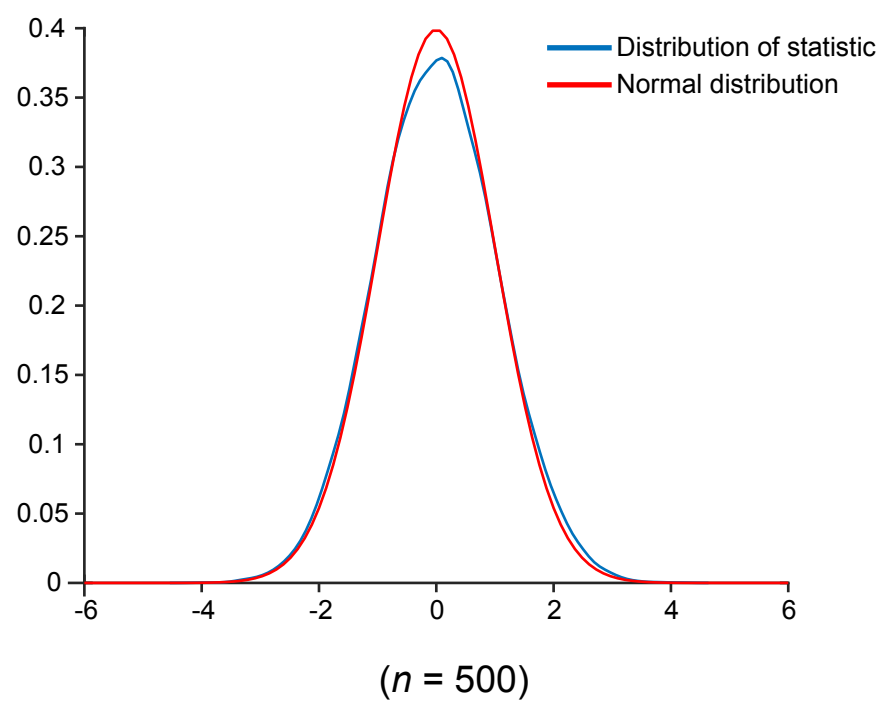

Supplement: mmc3.pdf [file mmc3.pdf]

**Kim**

**Buettner**

**Kolodziejczyk**

**Chu-time**

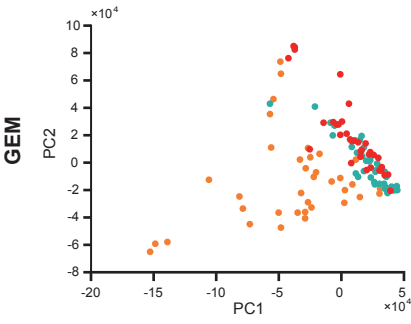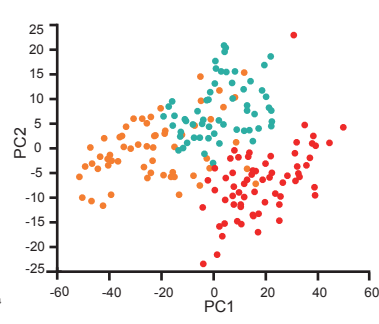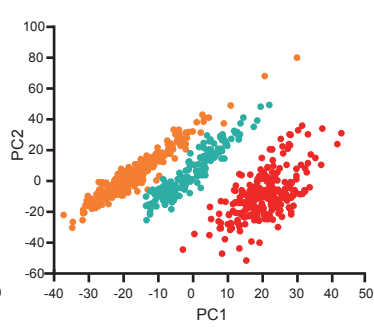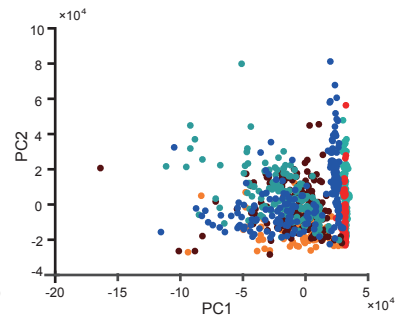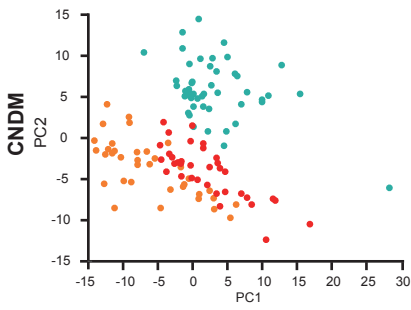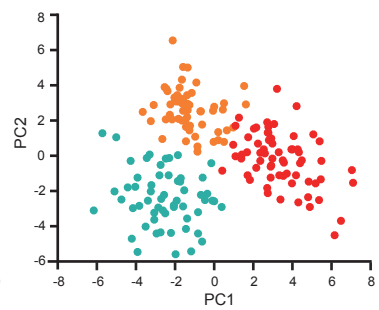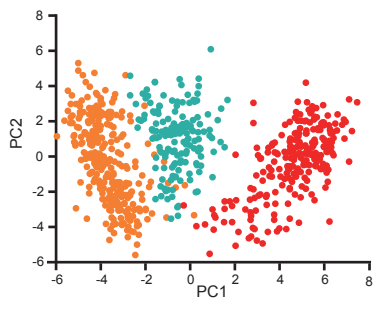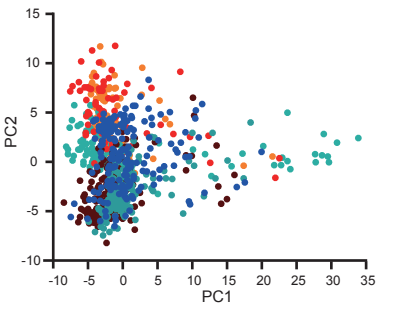

Supplement: mmc4.pdf [file mmc4.pdf]

K-means

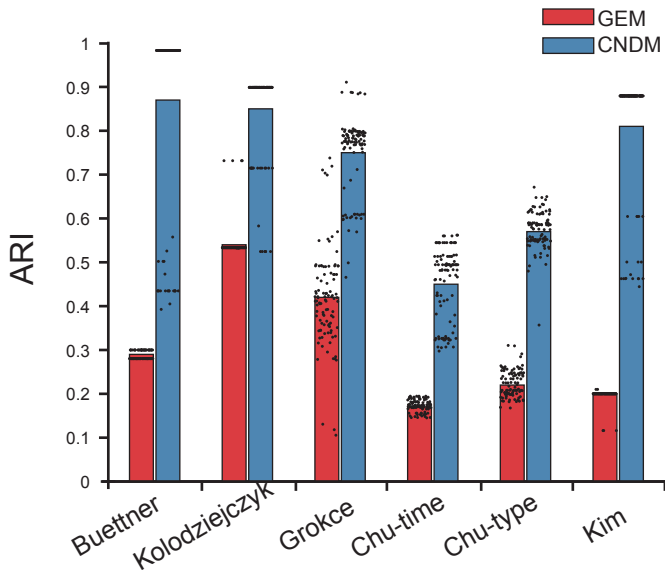

t-SNE + K-means

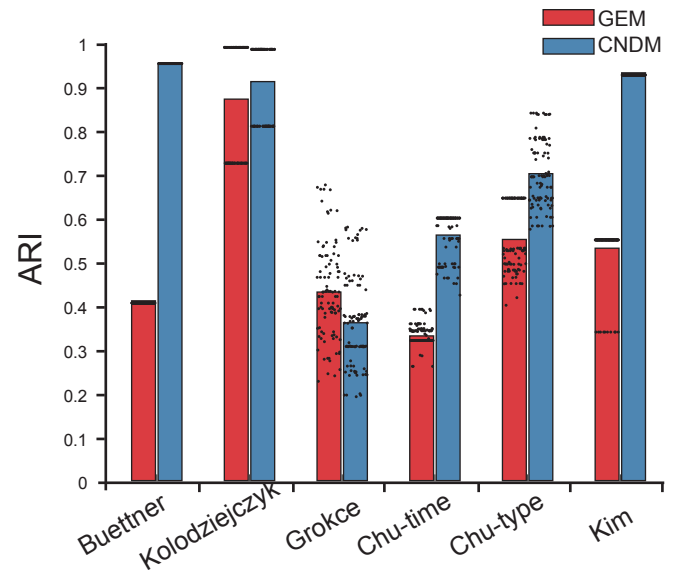

Hierarchical

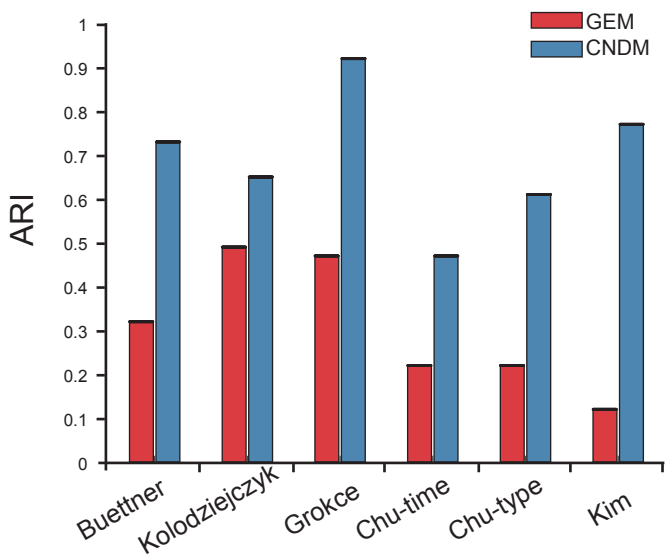

t-SNE + Hierarchical

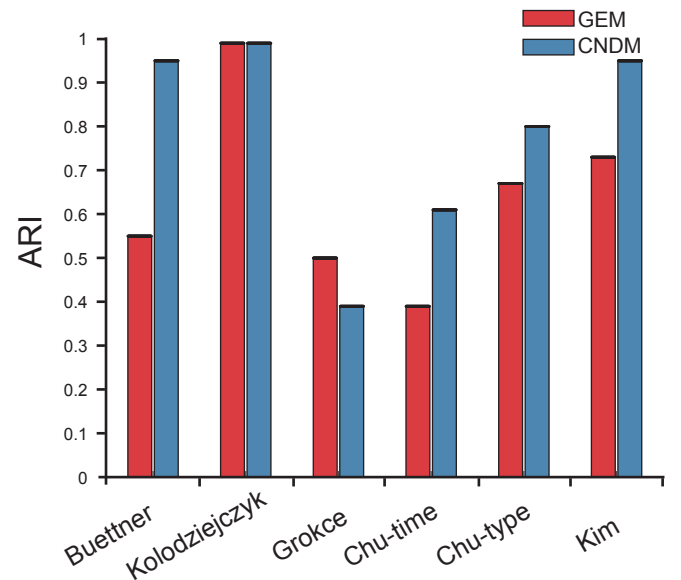

K-medoids

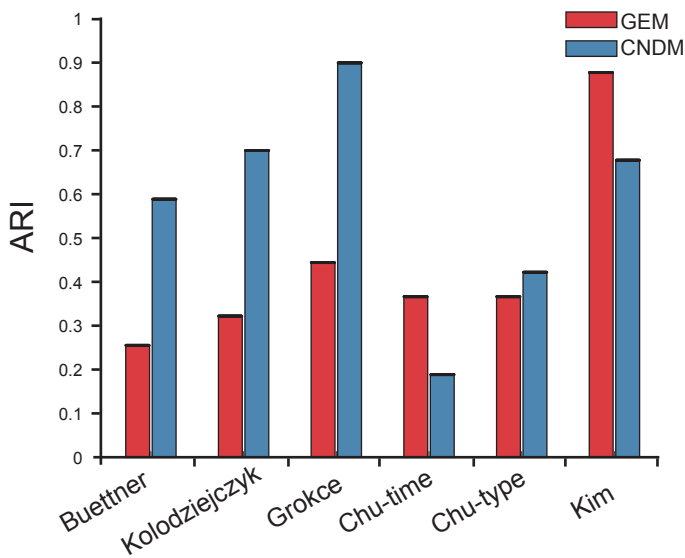

Supplement: mmc6.pdf [file mmc6.pdf]

### K-means

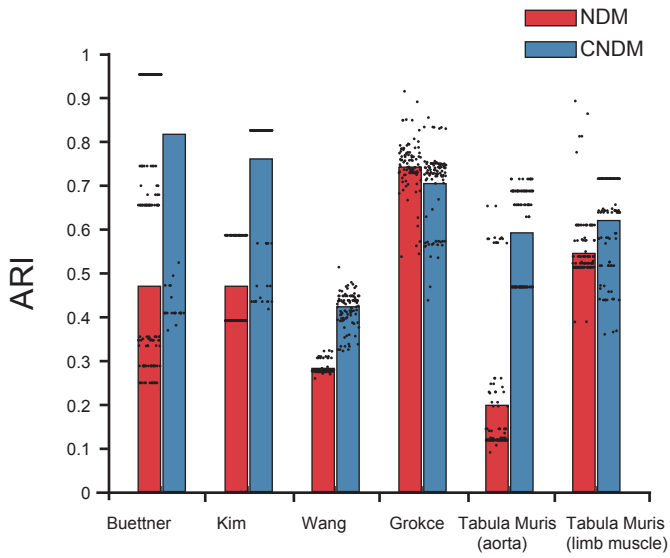

### t-SNE + K-means

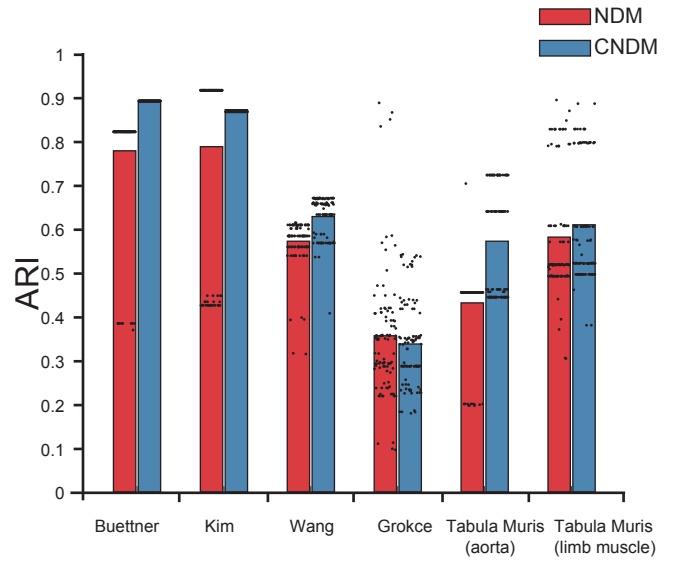

### Hierarchical

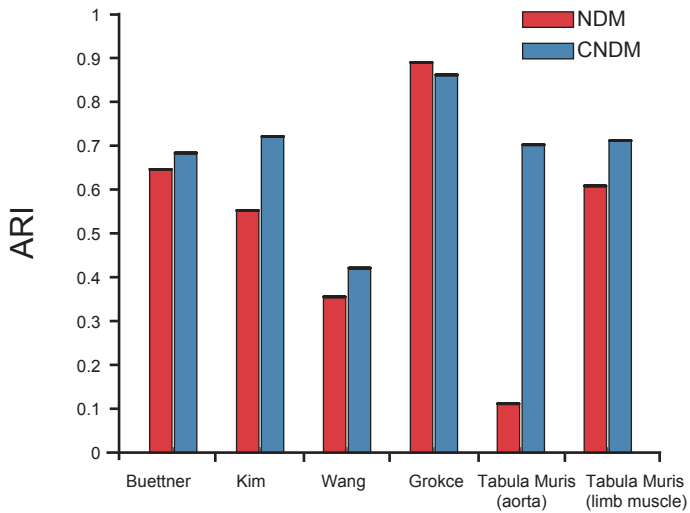

### t-SNE + Hierarchical

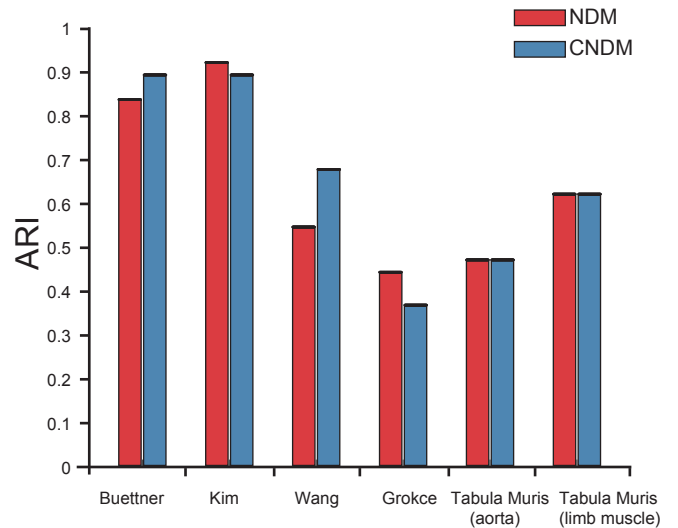

### K-medoids

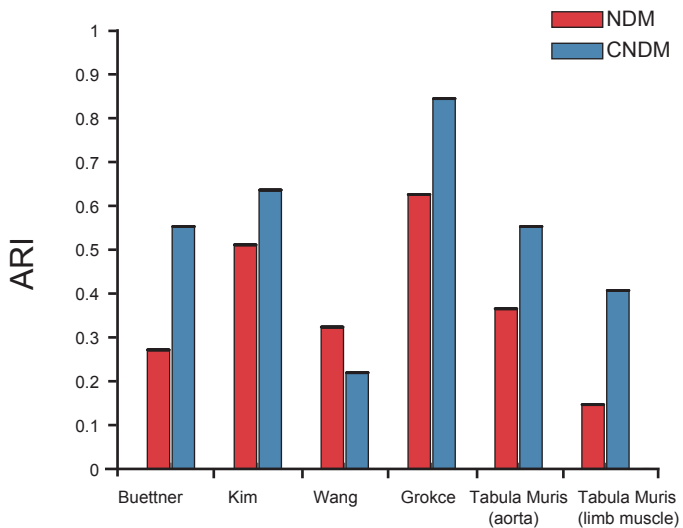

Supplement: mmc7.pdf [file mmc7.pdf]

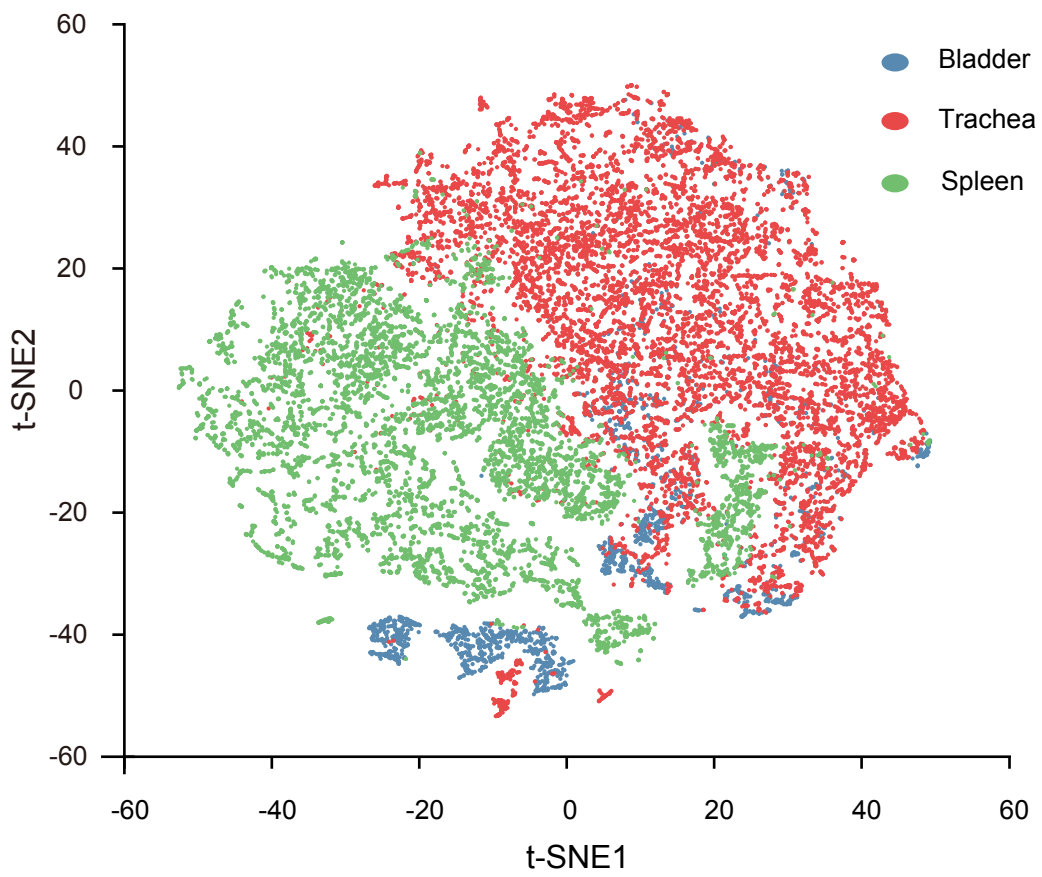

Supplement: mmc8.pdf [file mmc8.pdf]

A

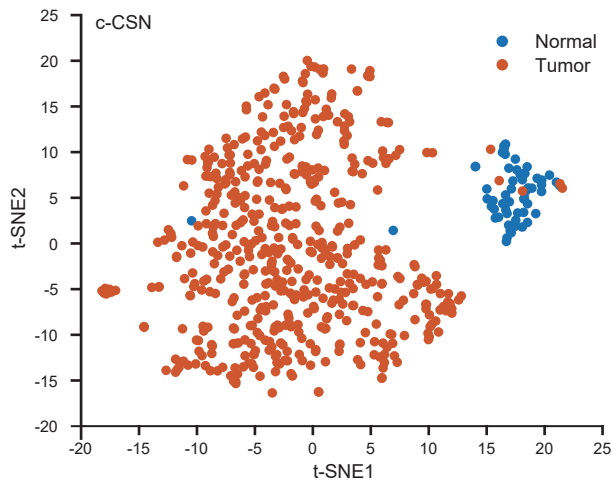

B

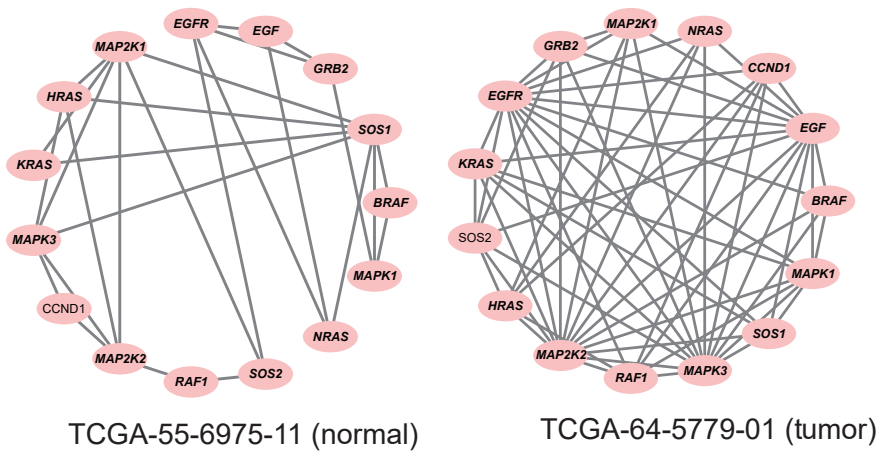

C

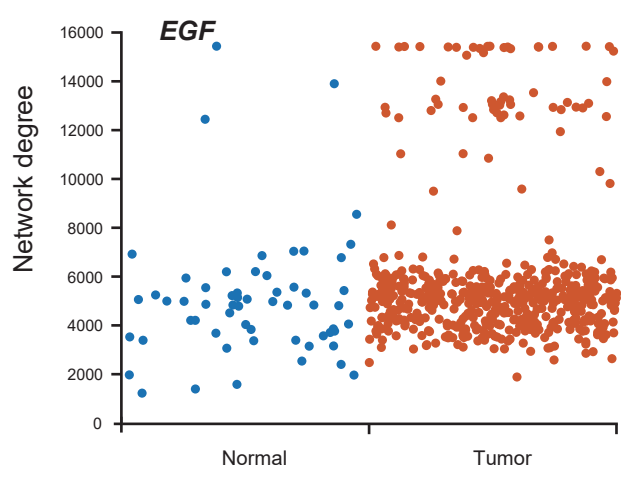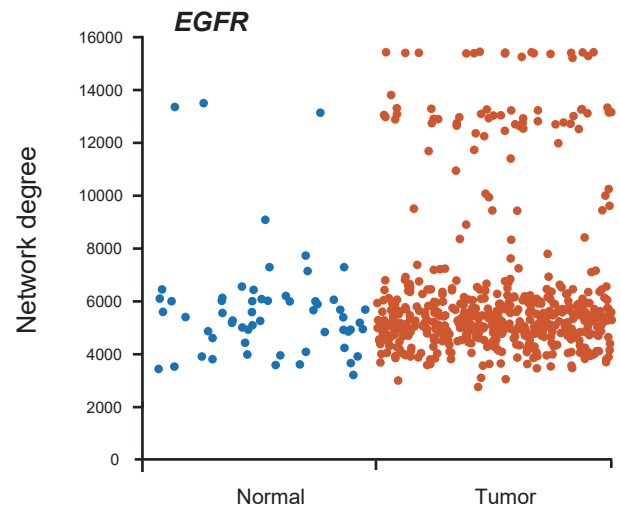

Supplement: mmc9.pdf [file mmc9.pdf]
